# Supplementary material for: Solar-thermochromism of a hybrid film of VO2 nanoparticles and CoII–Br–TMP complexes
Source: Royal Society of Chemistry journal article supplement (doi:10.1039/c6ra14232j), 2016-01-01
Supplement: c6ra14232j1.pdf [file c6ra14232j1.pdf]

## Electronic Supplementary Information

### Solar-thermochromism of Hybrid Film of VO<sub>2</sub> Nanoparticles and Co<sup>II</sup>-Br-TMP Complexes

J. T. Zhu,<sup>a,b</sup> A. B. Huang,<sup>a,b</sup> H. B. Ma,<sup>a,b</sup> S. H. Bao,<sup>a,b</sup> S. D. Ji<sup>a,b</sup> and P. Jin<sup>a,b,c\*</sup>

- Shanghai institute of Ceramics, Chinese Academy of Sciences, Dingxi 1295, Changning, Shanghai, 200050, China
- University of Chinese Academy of Sciences, Yuquan 19, Shijingshan, Beijing, 100049, China
- National Institute of Advanced Industrial Science and Technology (AIST), MoriYama, Nagoya 463-8560, Japan

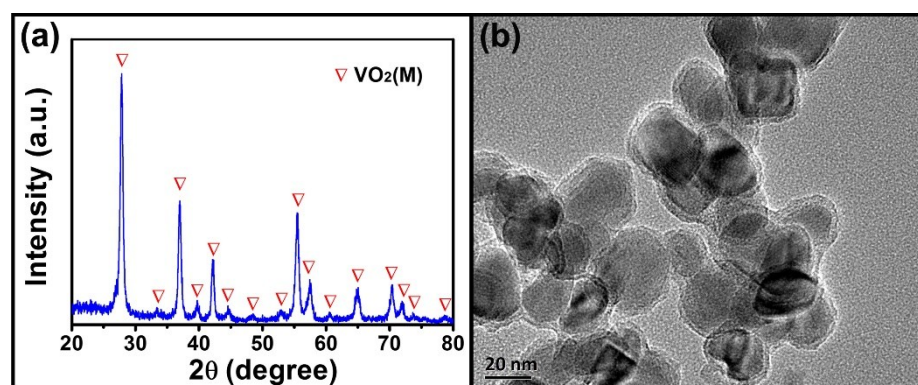

Fig. S1 (a) XRD pattern and (b) TEM image of the VO<sub>2</sub> nanoparticles we prepared.

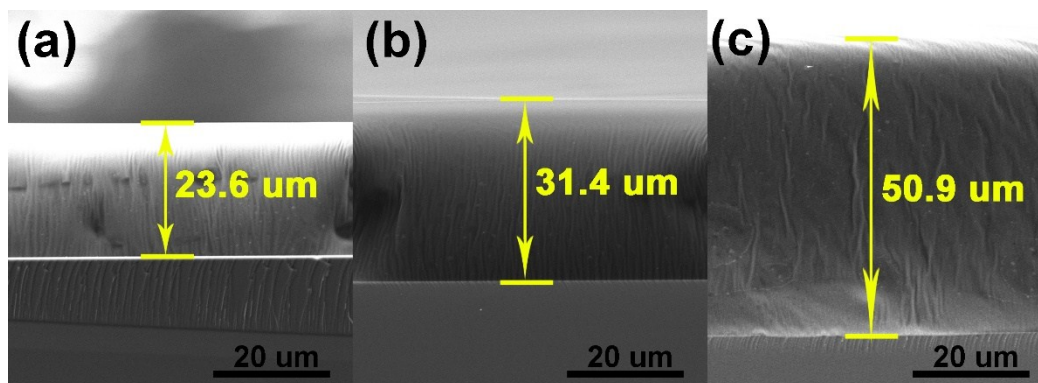

**Fig. S2** SEM pictures of the cross-sections of  $\text{VO}_2/\text{CLETS}$  hybrid films with different thicknesses: (a) around 20  $\mu\text{m}$ , (b) around 30  $\mu\text{m}$  and (c) around 50  $\mu\text{m}$ .

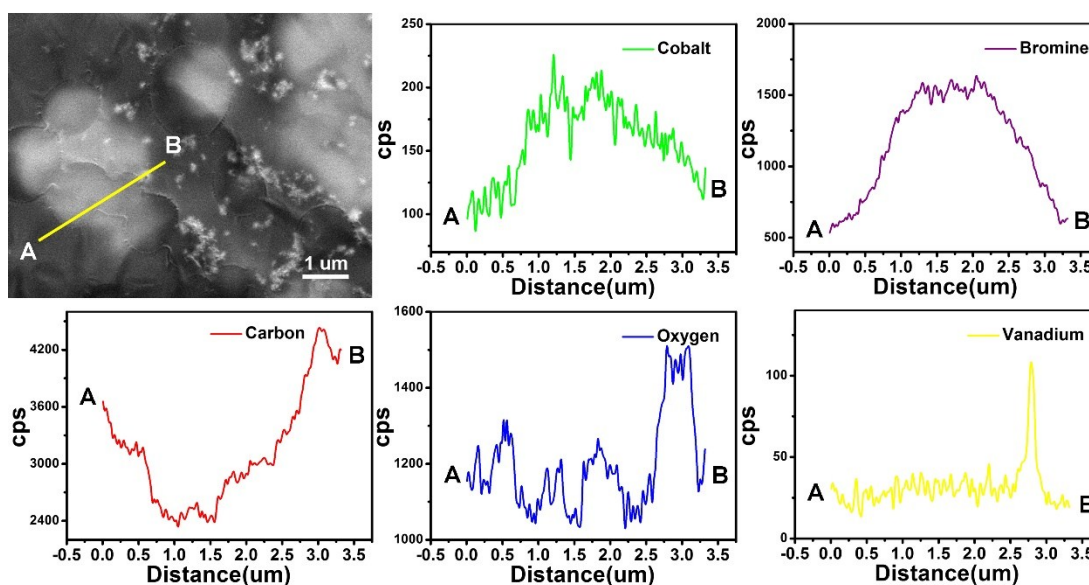

**Fig. S3** EDS line scanning patterns of elements of Co, Br, C, O and V along the direction marked in BS-SEM picture of  $\text{VO}_2/\text{CLETS}$  hybrid film from point A to point B. The variation in intensity of cobalt is in accordance with that of bromine and almost opposite to that of carbon, which implies that most of  $\text{Co(II)}$  are associated with Br as measuring confirming the results of EDS element mapping.
